# Supplementary material for: Global Patterns and Trends in Ground-Level Ozone Chemical Formation Regimes from 1996 to 2022
Source: Copernicus journal article supplement (doi:10.5194/egusphere-2025-368), 2025-02-04

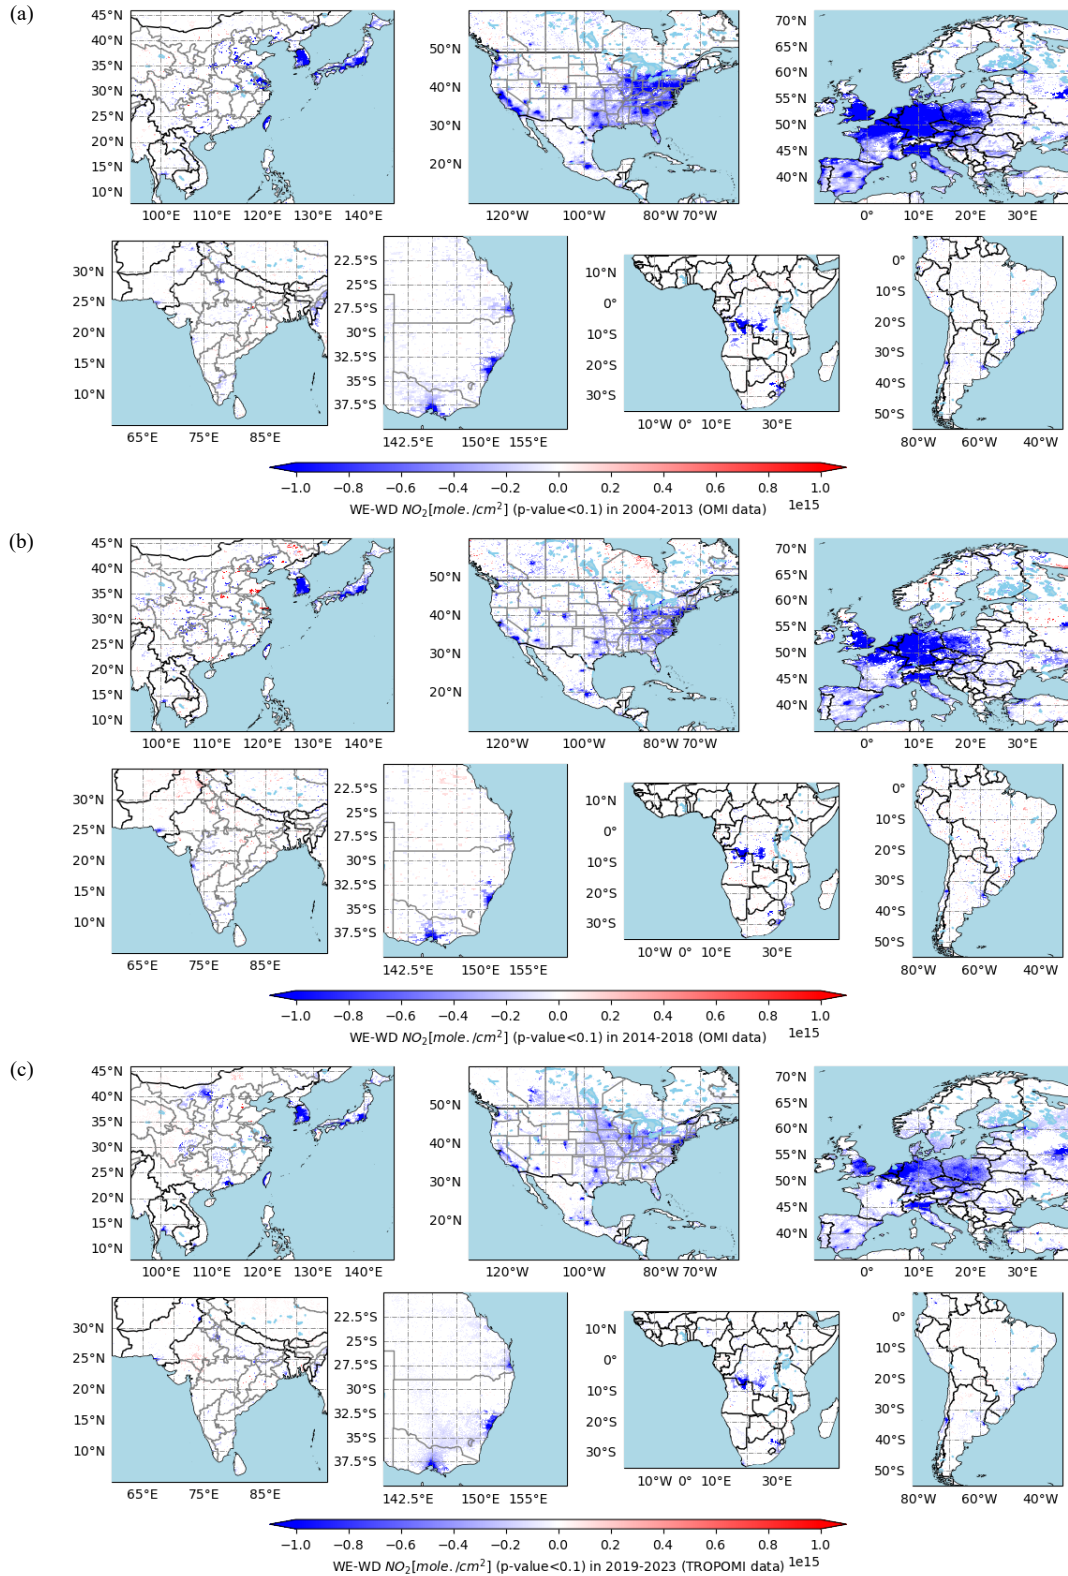

**Figure S1: Two-decade evolution of WE-WD  $\text{NO}_2$  differences by region across three distinct period: 2004-2013, 2014-2018, 2019-2023 for grid cells with p-value < 0.1.**

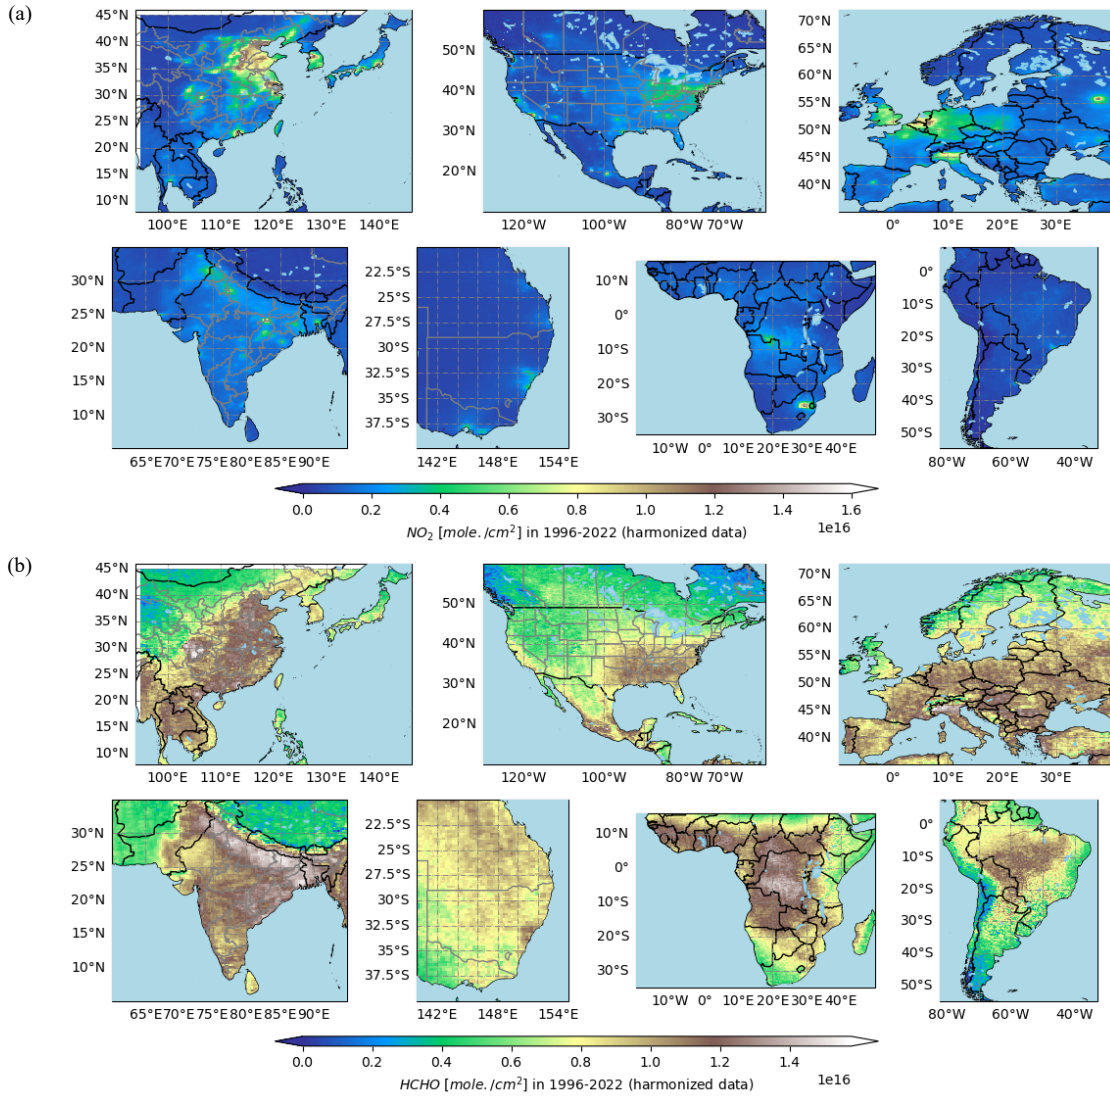

**Figure S2: Tropospheric  $NO_2$  and  $HCHO$  patterns as seen using the harmonized satellite data for the combined period 1996–2022.**

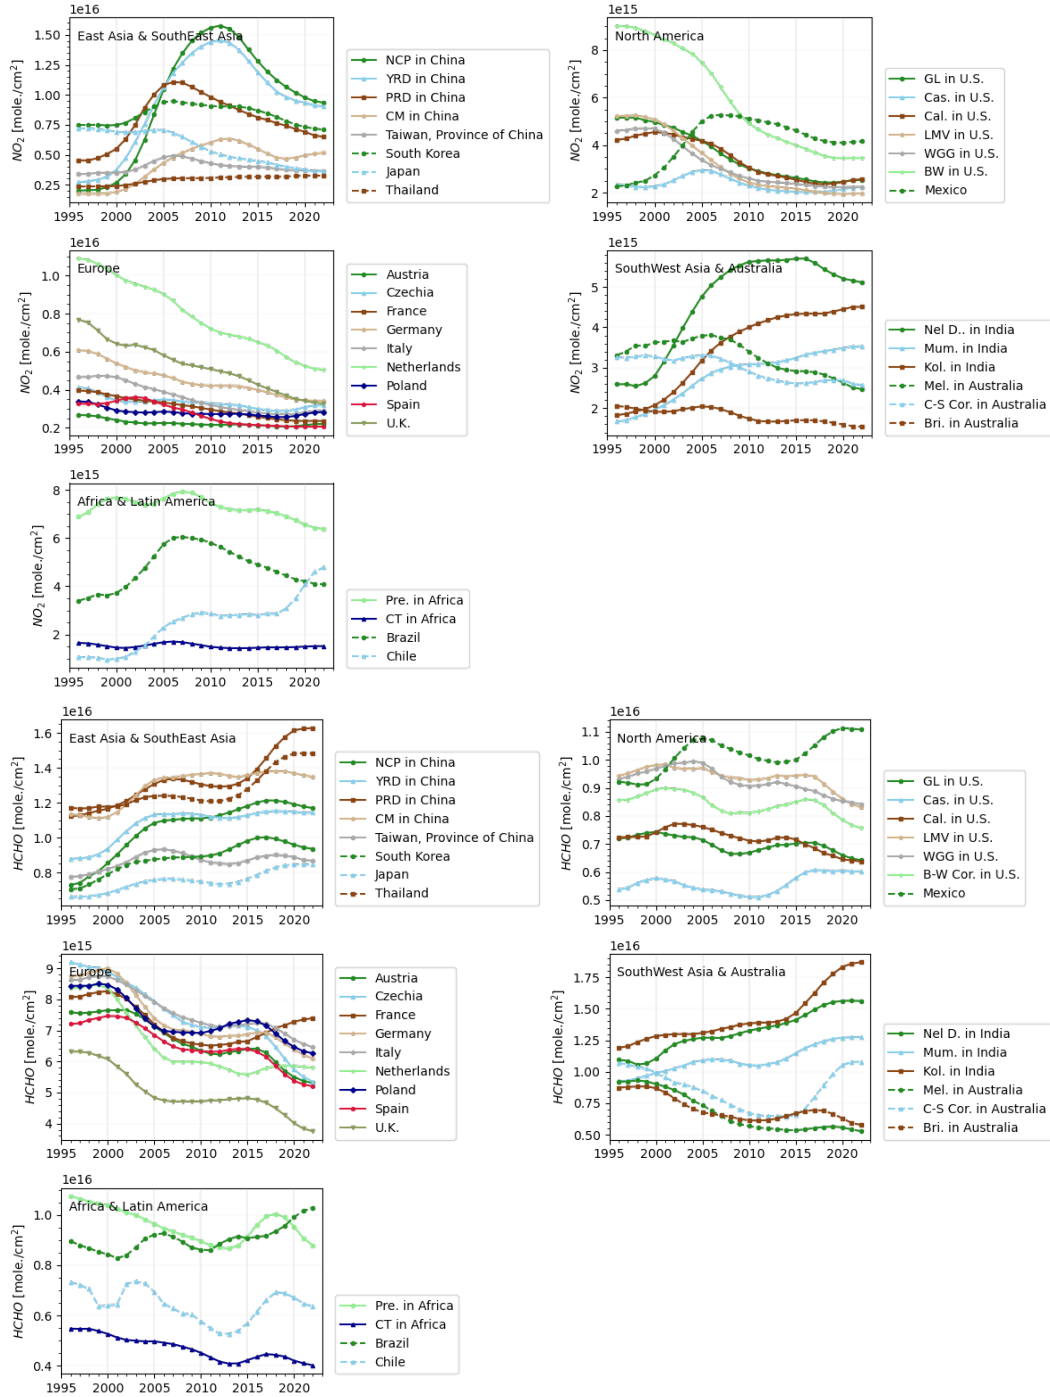

**Figure S3: Long-term trends of tropospheric  $\text{NO}_2$  and  $\text{HCHO}$  across major economic regions and selected countries based on the harmonized satellite data.**

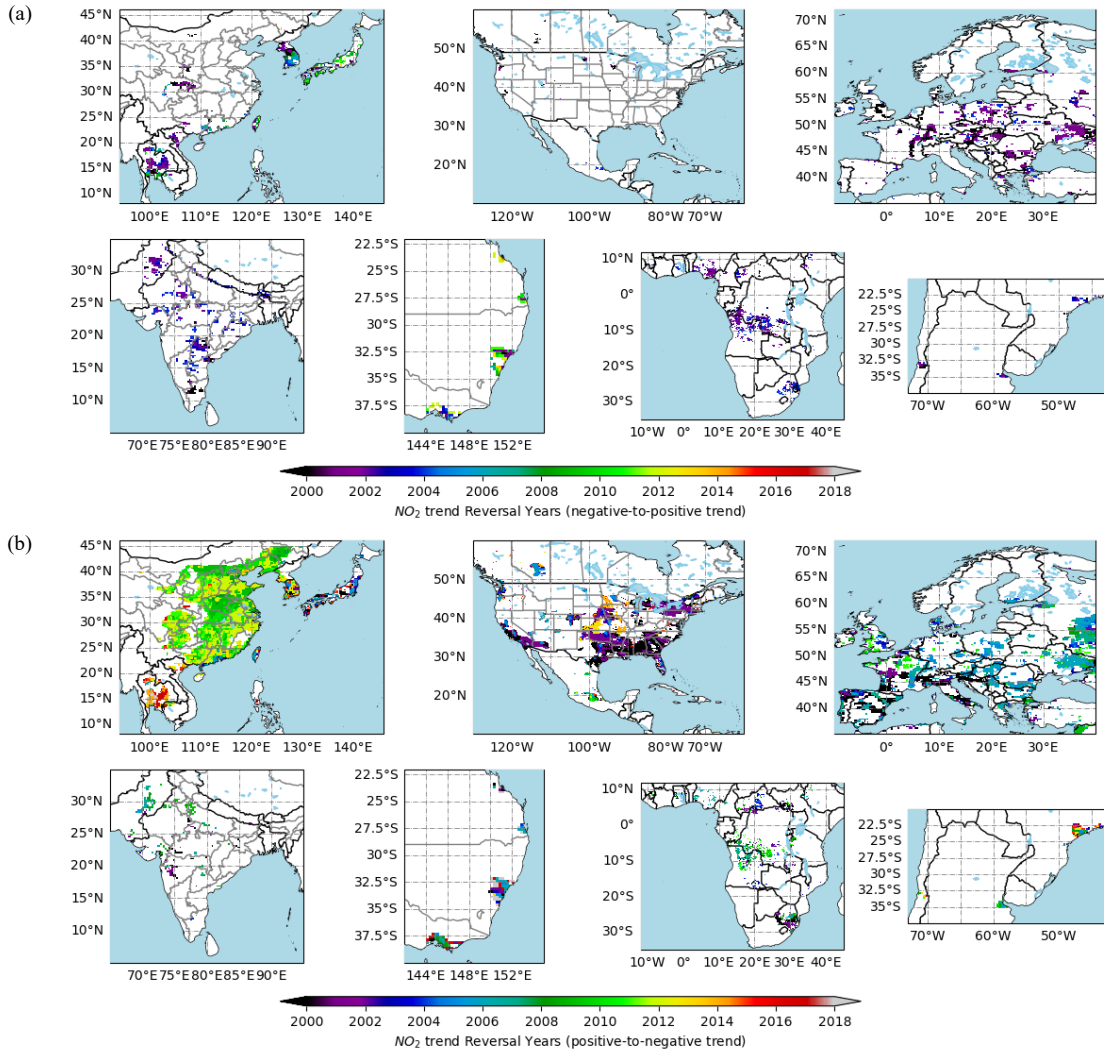

**Figure S4: Persistent trend reversals of tropospheric NO<sub>2</sub> ratio: (a) from negative to positive and (b) from positive to negative. Only grids with a with a long-term mean NO<sub>2</sub> VCD >  $1.5 \times 10^{15}$  (molecules · cm<sup>-2</sup>) and statistically significant trends with p value < 0.05 for the period before and after the year of reversals are shown.**

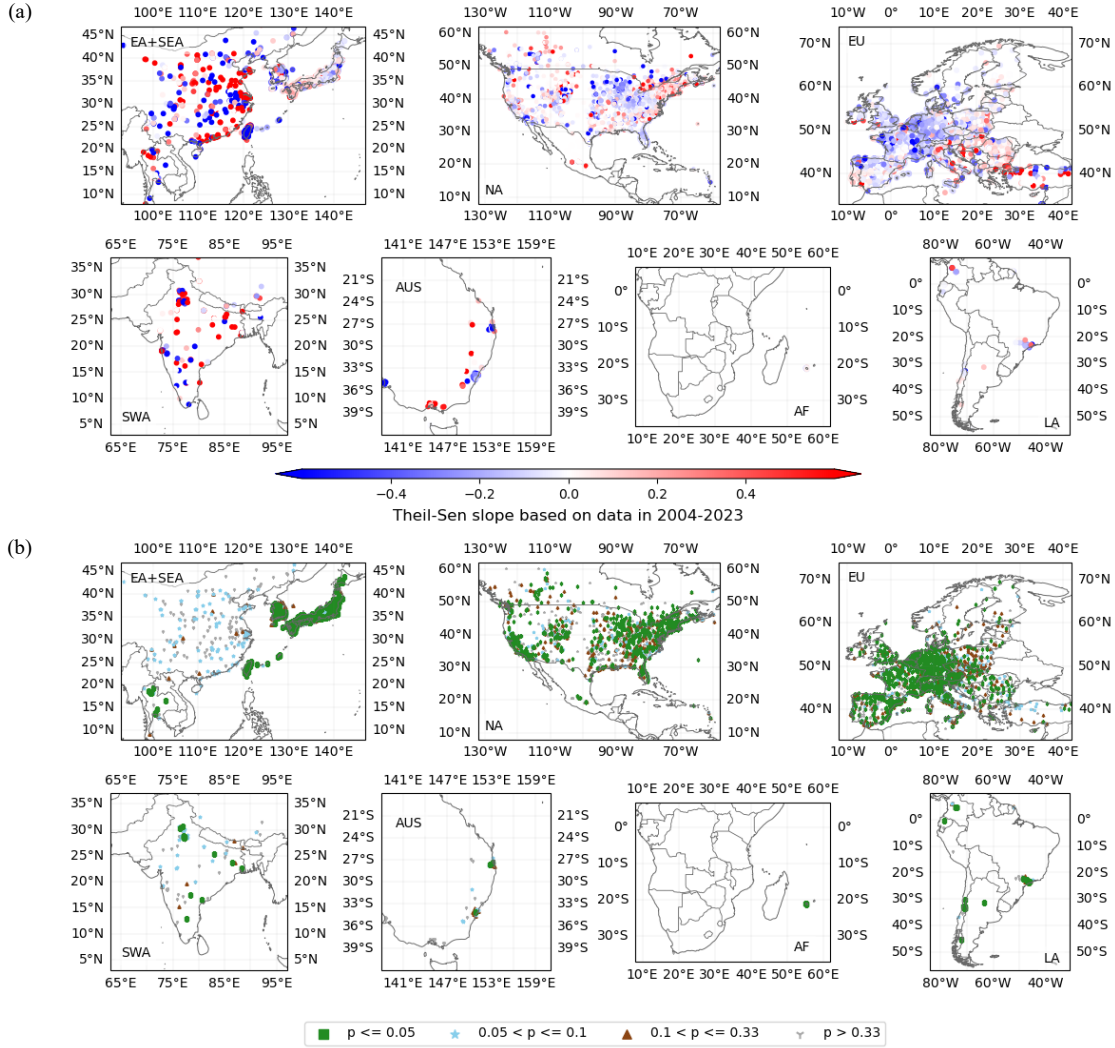

Supplement: Supplementary file 1 [file egusphere-2025-368-supplement.pdf]
